# Supplementary material for: Self-assembled porous film with interconnected 3-dimensional structure from 6sPCL-PMPC copolymer
Source: Royal Society of Chemistry journal article supplement (doi:10.1039/c5ra19670a), 2016-01-01
Supplement: c5ra19670a1.pdf [file c5ra19670a1.pdf]

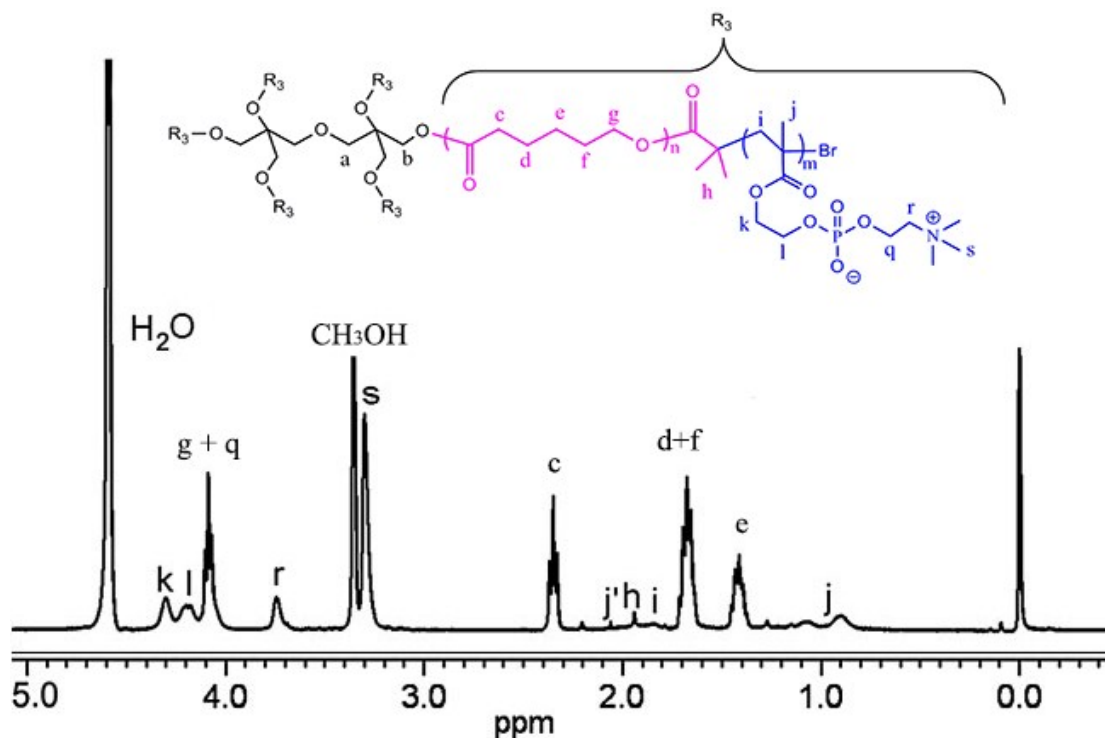

Figure S1  $^1\text{H}$  NMR (400 MHz) of 6sPCL<sub>80</sub>-PMPC<sub>20</sub> in the mixed solvent of CDCl<sub>3</sub> and CD<sub>3</sub>OD (2:1 v/v).

The  $M_n$  of the polymer is obtained by  $^1\text{H}$  NMR spectrum. When the polymer is abbreviated as 6sPCL<sub>n</sub>-PMPC<sub>m</sub> (the subscripts  $n$  and  $m$  denote the number average degree of polymerization), the  $M_n$  of the polymer can be calculated by the formula below,

$$M_n = M_i + 6 \times (n \times M_{CL} + m \times M_{MPC})$$

Where  $M_i$ ,  $M_{CL}$  and  $M_{MPC}$  denote the relative molecular mass of initiator,  $\epsilon$ -caprolactone and 2-methacryloyloxyethyl phosphorylcholine, respectively. The number average degree of polymerization i.e.  $n$  and  $m$  are obtained by  $^1\text{H}$  NMR spectra.

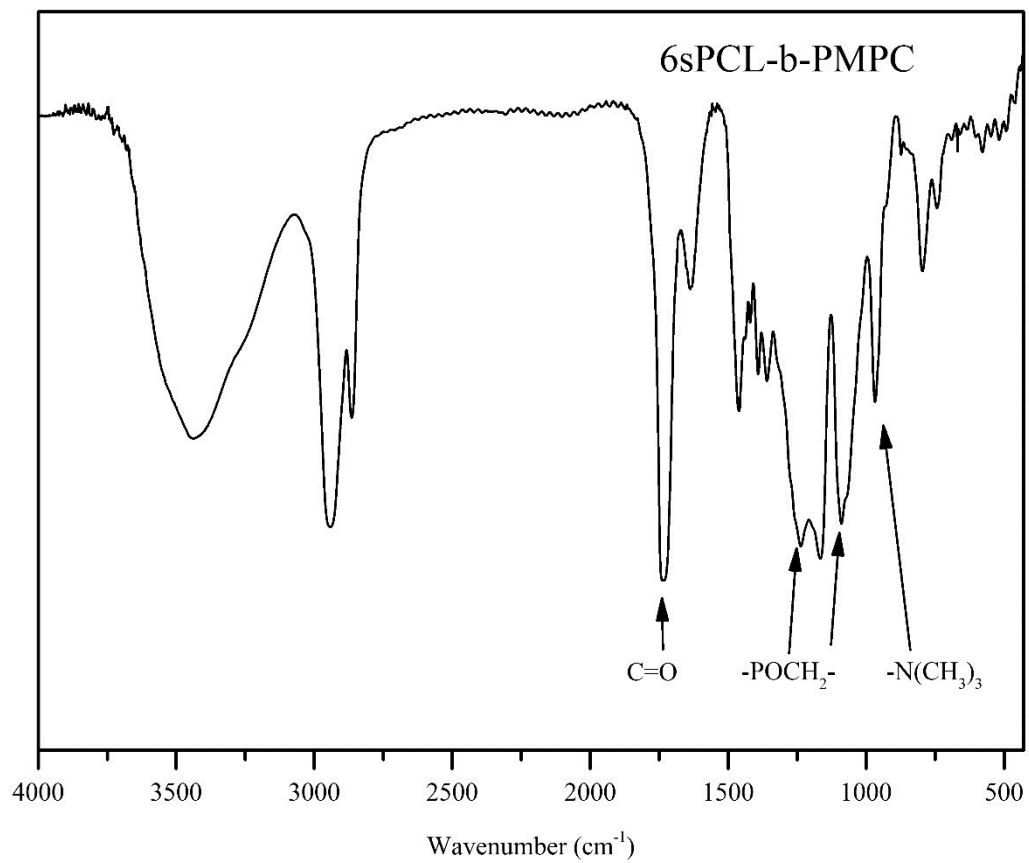

Figure S2 FT-IR spectra of 6sPCL<sub>80</sub>-PMPC<sub>20</sub>.

---

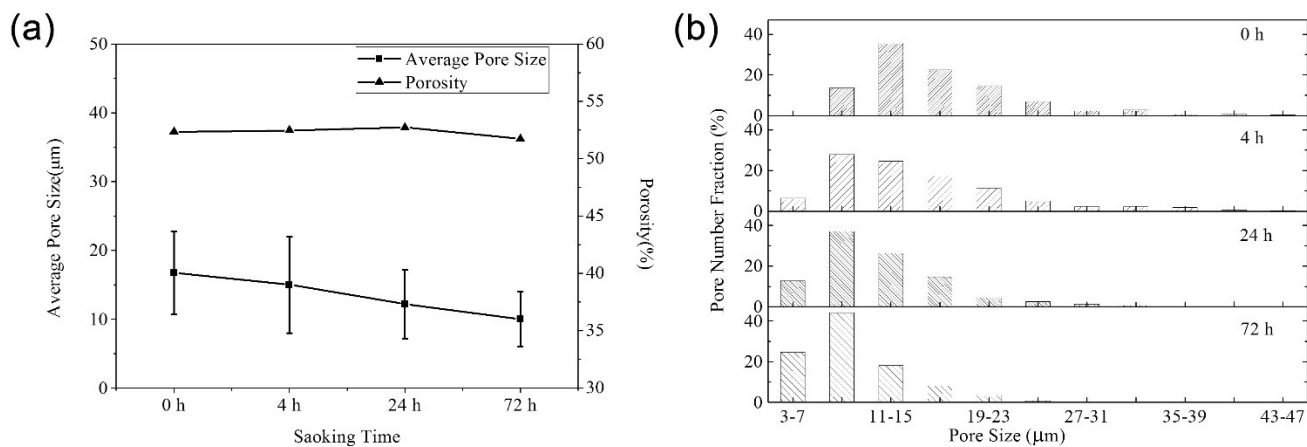

Figure S3 (a) Average pore size, porosity and (b) normalized pore size distribution of porous 6sPCL<sub>80</sub>-PMPC<sub>20</sub> films after soaking in water for different time. The films were prepared using the mixed solvent of THF and methanol ( $R = 2$ ), the preparation process temperature  $T_1 = 10$  °C.

---

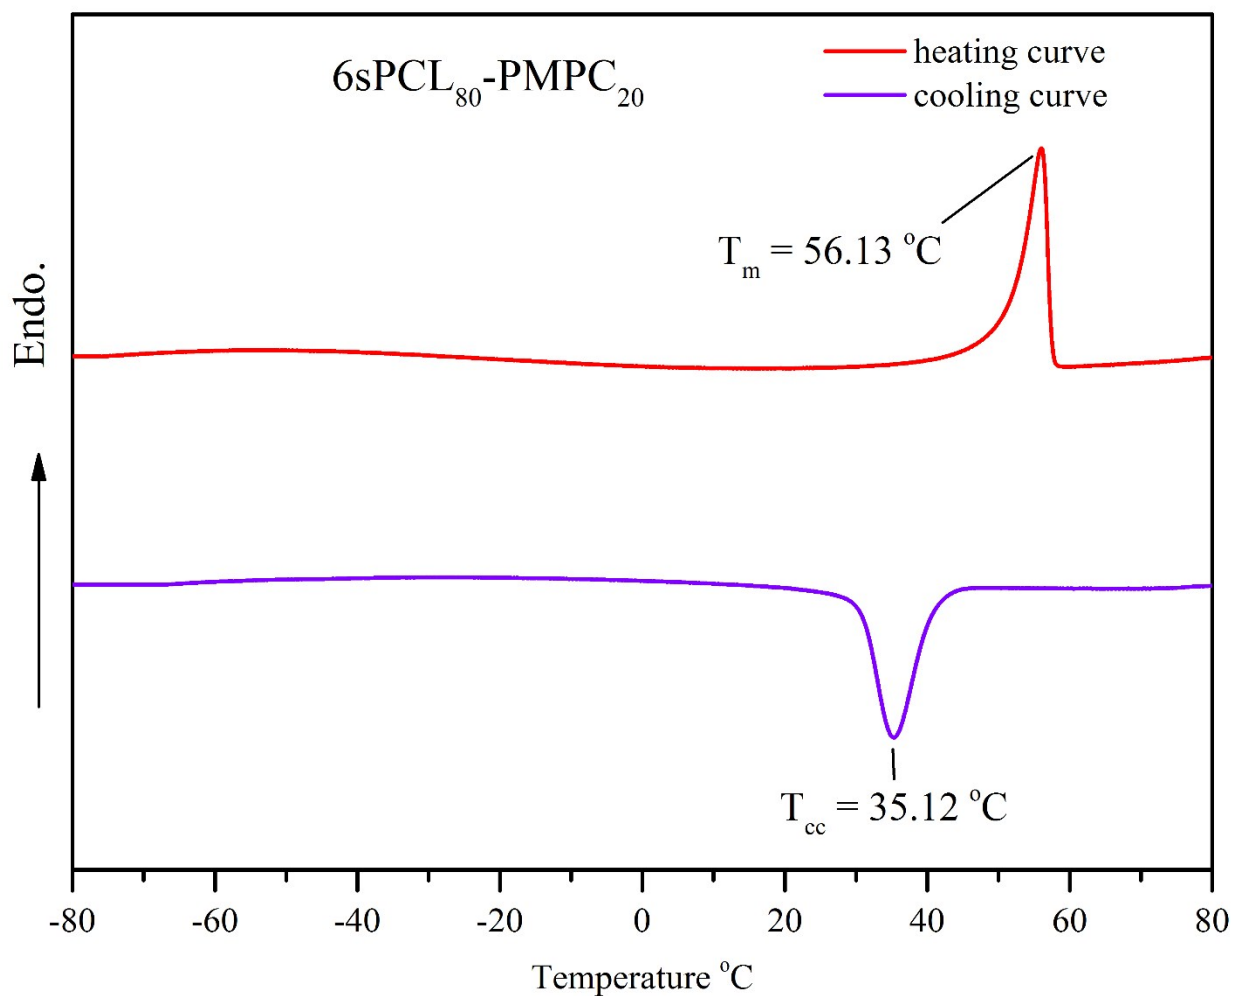

Figure S4 DSC curves of 6sPCL<sub>80</sub>-PMPC<sub>20</sub>. A PerkinElmer Instruments differential scanning calorimeter DSC 8500 equipped with a cooling apparatus was used. The nitrogen gas flow rate was 30 ml min<sup>-1</sup>. The sample was heated to 80 °C, held at 80 °C for 10 min and then cooled to -80 °C at a rate of 5 °C min<sup>-1</sup> (first cooling run). The sample was held at -80 °C for 10 min and then heated to 80 °C at 5 °C min<sup>-1</sup> (first heating run).

---

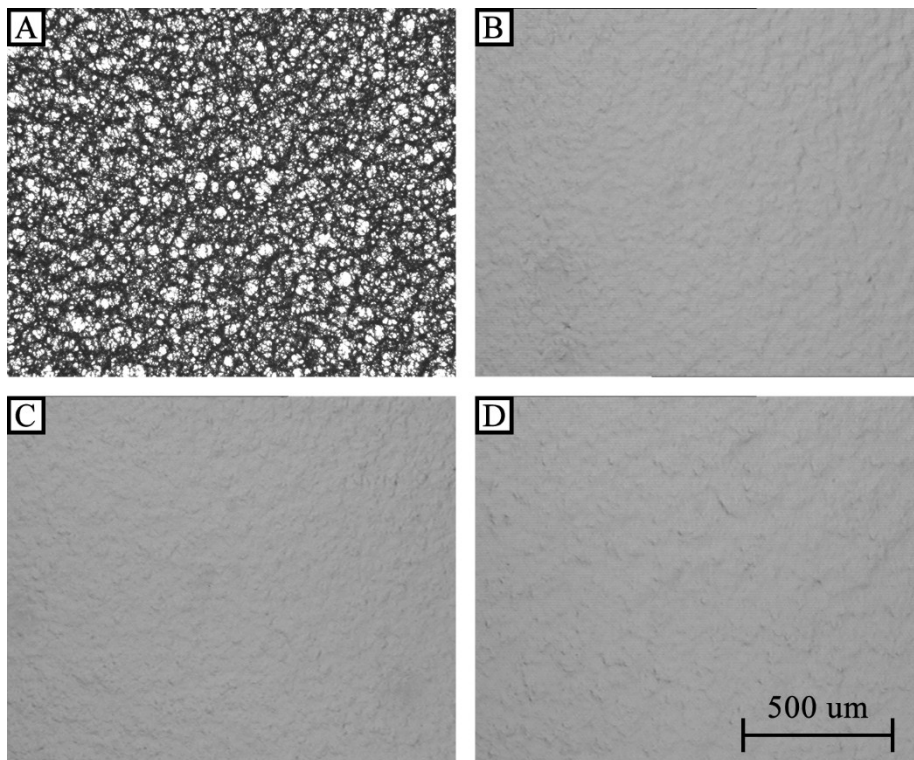

Figure S5 Optical microscope images of the film morphology of 6sPCL<sub>80</sub>-PMPC<sub>20</sub> dissolved in different mixed solvent. The preparation process temperature is  $T_1 = 10\text{ }^\circ\text{C}$  and the solution concentration is 10 mg/mL (A:  $R = 2$ ; B:  $R' = 1$ ; C:  $R' = 2$ ; D:  $R' = 3$ ;  $R$  is the volume ratio of THF to methanol, and  $R'$  is the volume ratio of DCM to methanol).

---
